# Supplementary material for: Morphological and Compositional Features of Chronic Internal Carotid Artery Occlusion in MR Vessel Wall Imaging Predict Successful Endovascular Recanalization
Source: MDPI journal article supplement (doi:10.3390/diagnostics13010147), 2023-01-01

Figure S1: Study flowchart

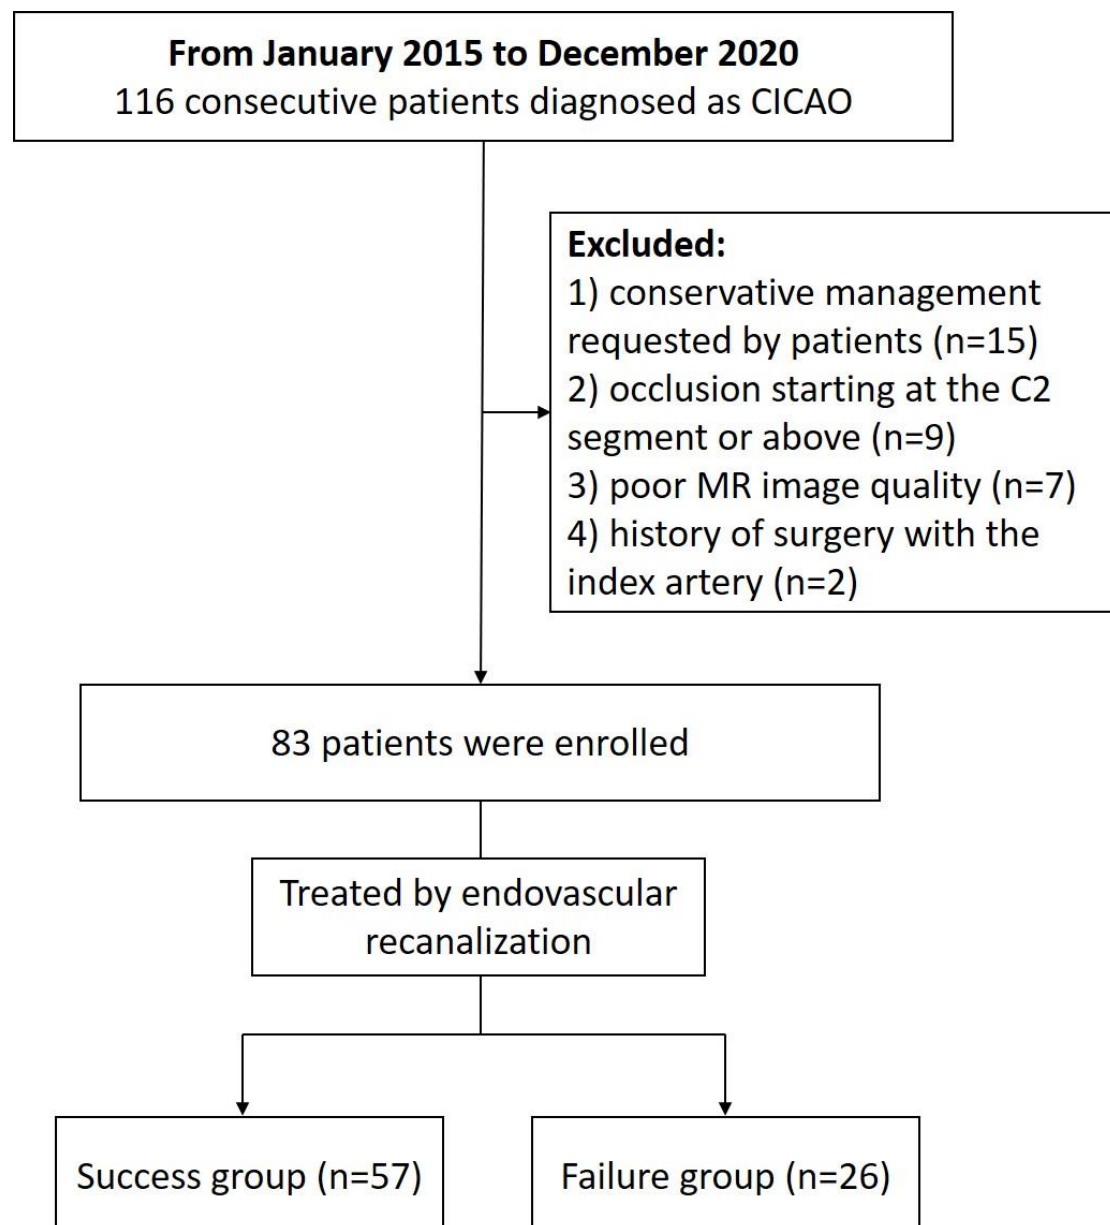

Figure S2: Success rates of endovascular recanalization according to the MR CICA0 score

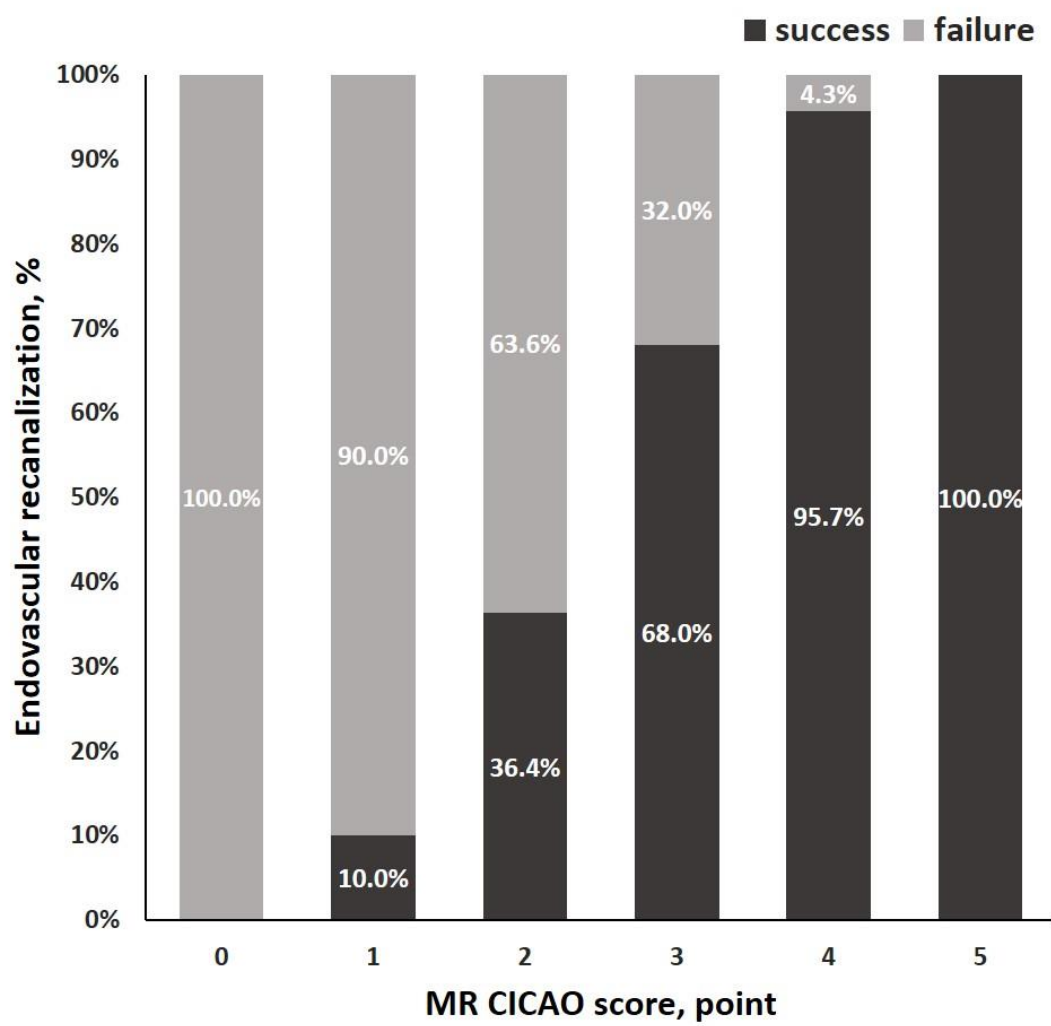

Supplement: s1 [file s1]
